# Supplementary material for: PGSE, OGSE, and sensitivity to axon diameter in diffusion MRI: Insight from a simulation study
Source: PubMed Central journal article supplement (PMC4975609; doi:10.1002/mrm.25631), 2015-03-25
Supplement: MRM-75-688-s001.pdf [file MRM-75-688-s001.pdf]

# 1 Supporting Material

## 1.1 Fixed b-value

Here we relate some of the sensitivity results to the b-value, the widely used measure for quantifying the amount of diffusion weighting. The experiment simulates restricted signal  $S_r(a)$  and its sensitivity  $S'_r(a)$  for the range of sequence parameters in  $\Lambda$  introduced in the Results in the Main Text. Figure 1 shows the results for  $a = 2\mu\text{m}$  (top),  $a = 10\mu\text{m}$  (medium) and  $a = 40\mu\text{m}$  (bottom) for both  $N = 1$  (left two columns) and  $N = 2$  (right two columns). Note that an infinite slew rate is assumed for simplicity of the comparisons. White lines overlaid onto the figure are data for fixed b-values  $b \in \{300, 2500, 12500, 50000, 125000\}$  s/mm<sup>2</sup>.

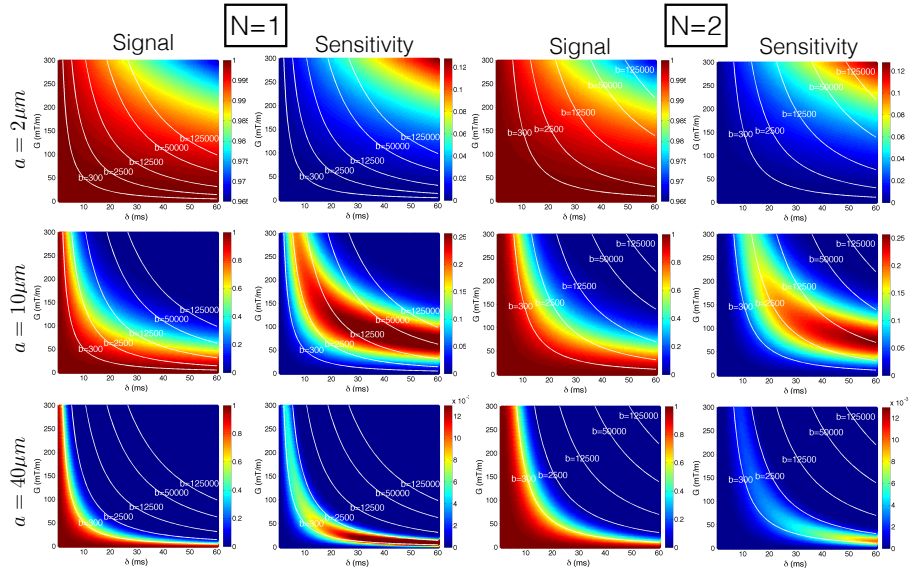

Figure 1: Fixed b-value comparison. Figure shows restricted signal  $S_r(a)$  and its sensitivity to axon diameter  $S'_r(a)$  for  $a \in \{2, 10, 40\}\mu\text{m}$ . The absolute values of  $S_r$  and  $S'_r$  are colour coded, with dark red being the highest value. The white lines are the lines with fixed b-values  $b \in \{300, 2500, 12500, 50000, 125000\}$  s/mm<sup>2</sup>. Unit of  $S'_r(a)$  is  $1/\mu\text{m}$ .

The figure shows that, in the case of restriction, different combinations of  $\delta$ ,  $G$  and  $N$  can produce the same b-value while achieving very different signal attenuation and sensitivity to axon diameter. This can be seen from how aligned the plot isolines are with respect to the fixed b-value lines (b-lines). For example, for axon diameters of  $40\mu\text{m}$ , which provide almost free diffusion environment for the set of parameters considered here, isolines and b-lines are

almost perfectly aligned. On the other hand, for smaller diameters, the b-lines and the isolines are misaligned, suggesting that in the presence of strong restriction, signal attenuation depends on complex combinations of  $\delta$ ,  $G$  and  $N$  that can be very different from the particular combination defined by the b-value. The results for both  $N = 1$ ,  $N = 2$  and larger  $N$  (data not shown) all support the same conclusions. At present, when reporting the settings of a diffusion MRI experiment, b-value is commonly given without providing the detailed settings for the diffusion gradients. This figure shows that this practice is inadequate in the presence of significant restrictions.

## 1.2 Fixed $G$ and $\delta$

Here we show a simple illustrative example of the impact  $\theta > 0$  and fibre dispersion have on the diffusion signal for  $N = 1$  and  $N > 1$  cases when both gradient strength and the pulse duration are fixed. Figure 2 shows a range of sequences with  $N \in \{1, 2, 3, 4, 5, 6\}$  for a given gradient strength  $G = 300\text{mT/m}$  and pulse duration  $\delta = 40\text{ms}$ . Note that an infinite slew rate is assumed for simplicity of the comparisons. When the  $\theta = 0$  the sensitivity to axon diameter of different  $N$ 's is very similar. However, when  $\theta > 0$  (the middle row) or fibres are dispersed (the right row) the sequence with the lowest b-value,  $N = 6$ , is the most sensitive, i.e. has the largest slope.

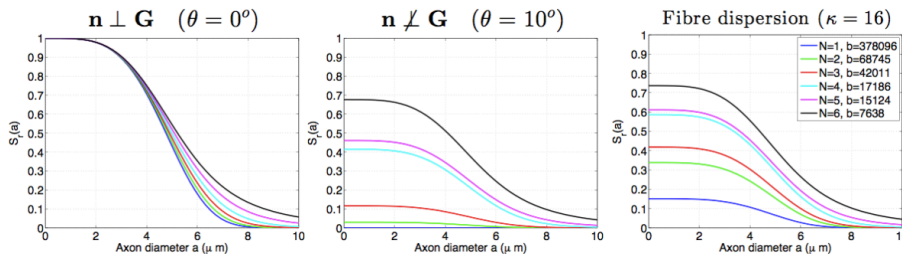

Figure 2: A simple illustrative example of the impact  $\mathbf{n} \perp \mathbf{G}$  or fibre dispersion have on the diffusion signal. A range of sequences with  $N \in \{1, 2, 3, 4, 5, 6\}$  for a given gradient strength  $G = 300\text{mT/m}$  and pulse duration  $\delta = 40\text{ms}$  are shown.
